# Supplementary material for: Enhanced field emission performance of MXene–TiO2 composite films
Source: Royal Society of Chemistry journal article supplement (doi:10.1039/d0nr08900a), 2021-01-01
Supplement: d0nr08900a1.pdf [file d0nr08900a1.pdf]

*Supplementary Information*

**Enhanced field emission performance of MXene-TiO<sub>2</sub> composite  
film**

Bingjun Yang,<sup>a,c</sup> Jiangtao Chen,<sup>a,e</sup> Xiaonan Wu,<sup>d</sup> Bao Liu,<sup>a,c</sup> Lingyang Liu,<sup>a</sup>

Yu Tang,<sup>\*b</sup> and Xingbin Yan<sup>\*a,c</sup>

<sup>a</sup>Laboratory of Clean Energy Chemistry and Materials, State Key Laboratory of Solid Lubrication, Lanzhou Institute of Chemical Physics, Chinese Academy of Sciences, Lanzhou 730000, China

<sup>b</sup>State Key Laboratory of Applied Organic Chemistry, Key Laboratory of Nonferrous Metal Chemistry and Resources Utilization of Gansu Province, College of Chemistry and Chemical Engineering, Lanzhou University, Lanzhou 730000, China

<sup>c</sup>Center of Materials Science and Optoelectronics Engineering, University of Chinese Academy of Sciences, Beijing 100049, China

<sup>d</sup>Institute of Nuclear Physics and Chemistry, China Academy of Engineering Physics, Mianyang, 621900, P.R. China

<sup>e</sup>Key Laboratory of Atomic and Molecular Physics & Functional Materials of Gansu Province, College of Physics and Electronic Engineering, Northwest Normal University, Lanzhou 730070, PR China

\*Corresponding authors: Xingbin Yan, Yu Tang

E-mail: xbyan@licp.cas.cn, tangyu@lzu.edu.cn.

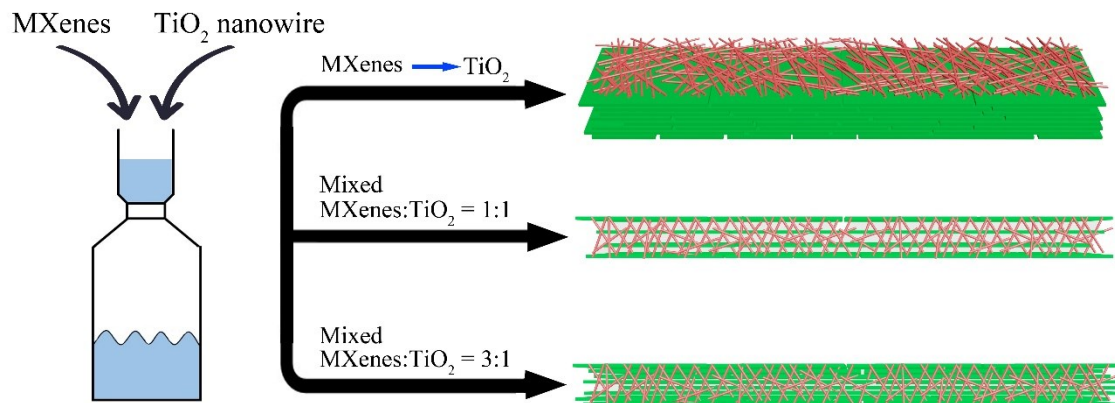

**Figure S1.** Schematic preparation representation of MXene-TiO<sub>2</sub> composites with different structure and content ratio of MXene to TiO<sub>2</sub>.

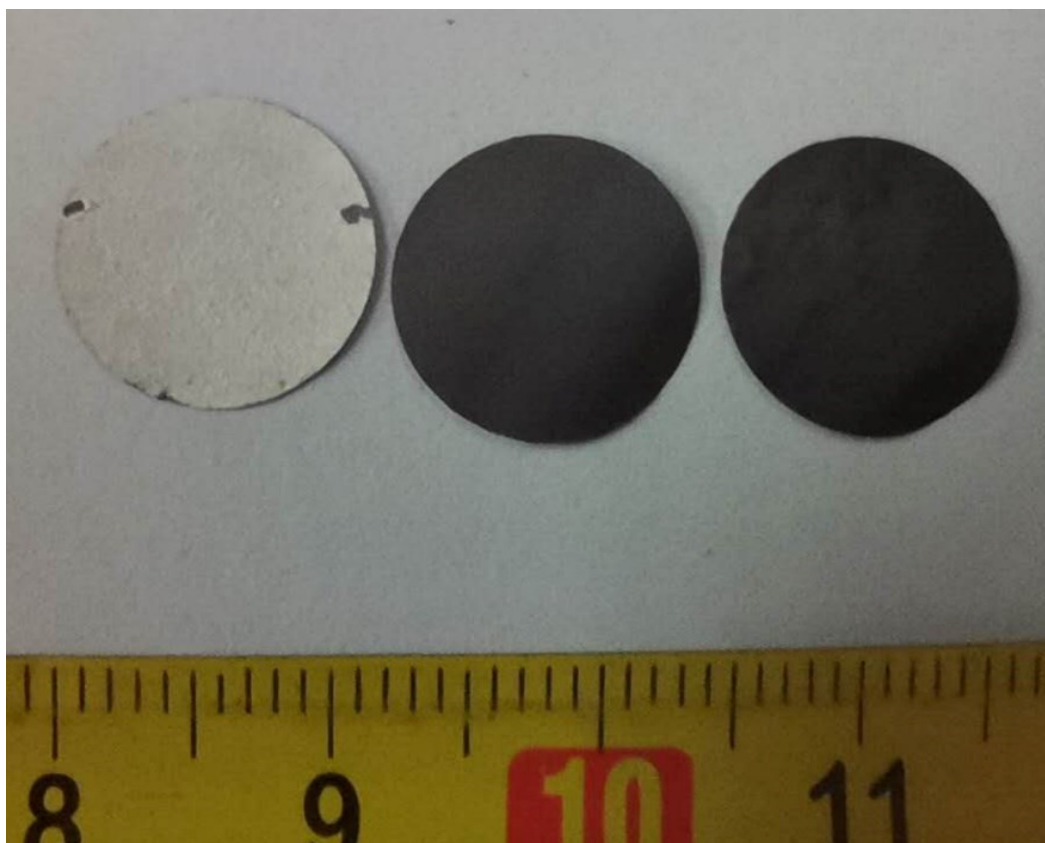

**Figure S2.** Digital image of MXene-TiO<sub>2</sub> composites with different structure and content ratio of MXene to TiO<sub>2</sub>. From left to right in turn is MXene-TiO<sub>2</sub> (1:1 top), MXene-TiO<sub>2</sub> (3:1 mixed), and MXene-TiO<sub>2</sub> (1:1 mixed).

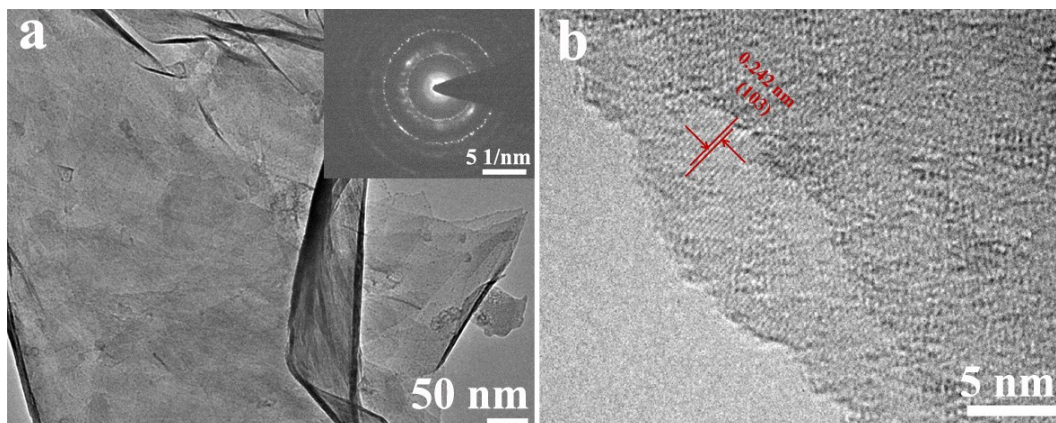

**Figure S3.** (a) TEM image and corresponding SAED pattern (inset) of MXene. (b)

HRTEM image of MXene

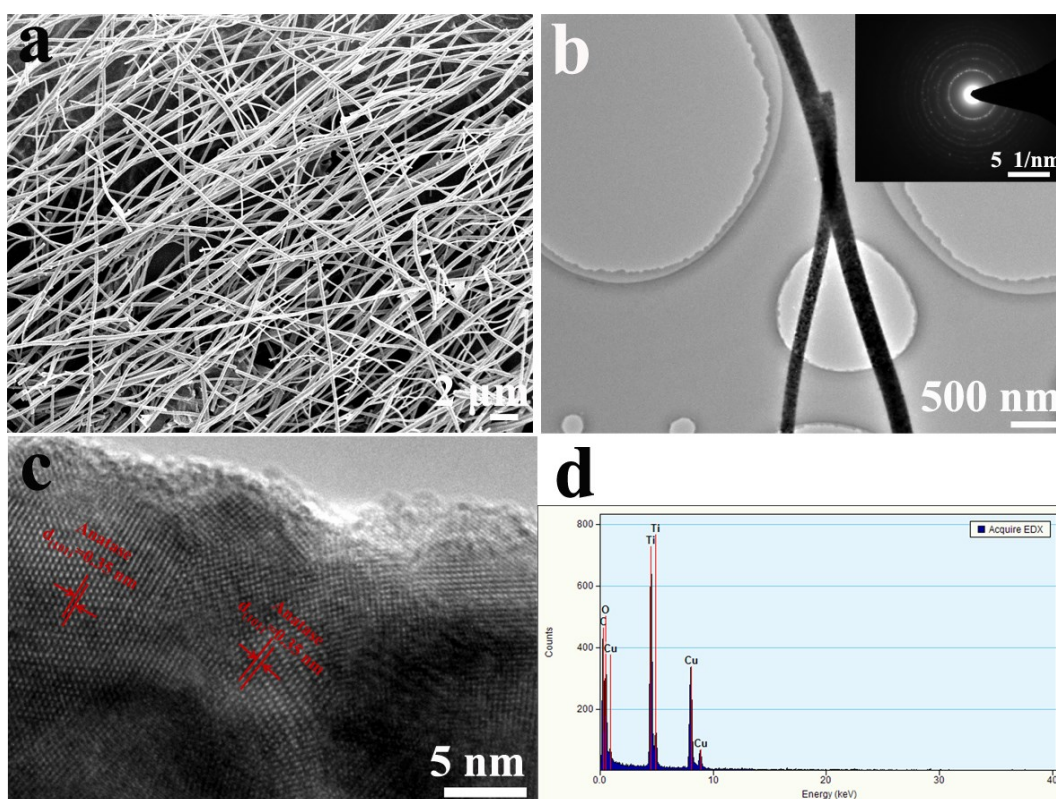

**Figure S4.** (a) SEM image of TiO<sub>2</sub> nanowires. (b) TEM image and corresponding SAED pattern (inset) of TiO<sub>2</sub> nanowires. (c) HRTEM image and (d) EDX spectrum of TiO<sub>2</sub> nanowires.

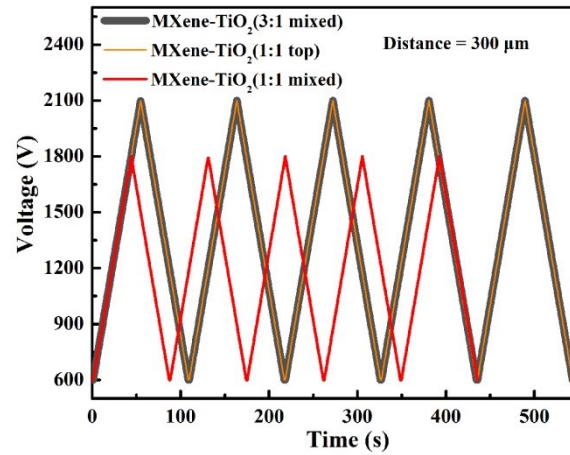

**Figure S5.** The curves of applied raised and falled voltages as the function of the time, the anode-cathode distance is  $300\ \mu\text{m}$ . The applied voltage across the MXene-TiO<sub>2</sub> (1:1 mixed) composite is lowest than the other two samples.

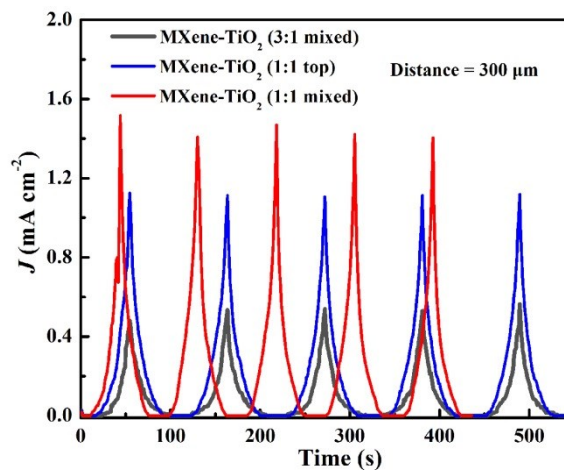

**Figure S6.** The curves of the current emission under the applied voltages showed in Figure S5, the anode-cathode distance is  $300\ \mu\text{m}$ . The MXene-TiO<sub>2</sub> (1:1 mixed) composite exhibits largest current emission density among the three samples.

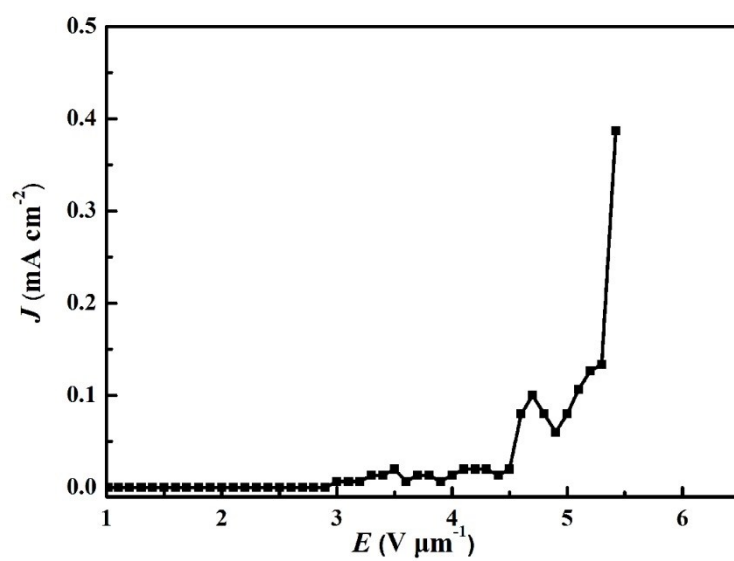

**Figure S7.** Field emission performance of the pure TiO<sub>2</sub> emitter.

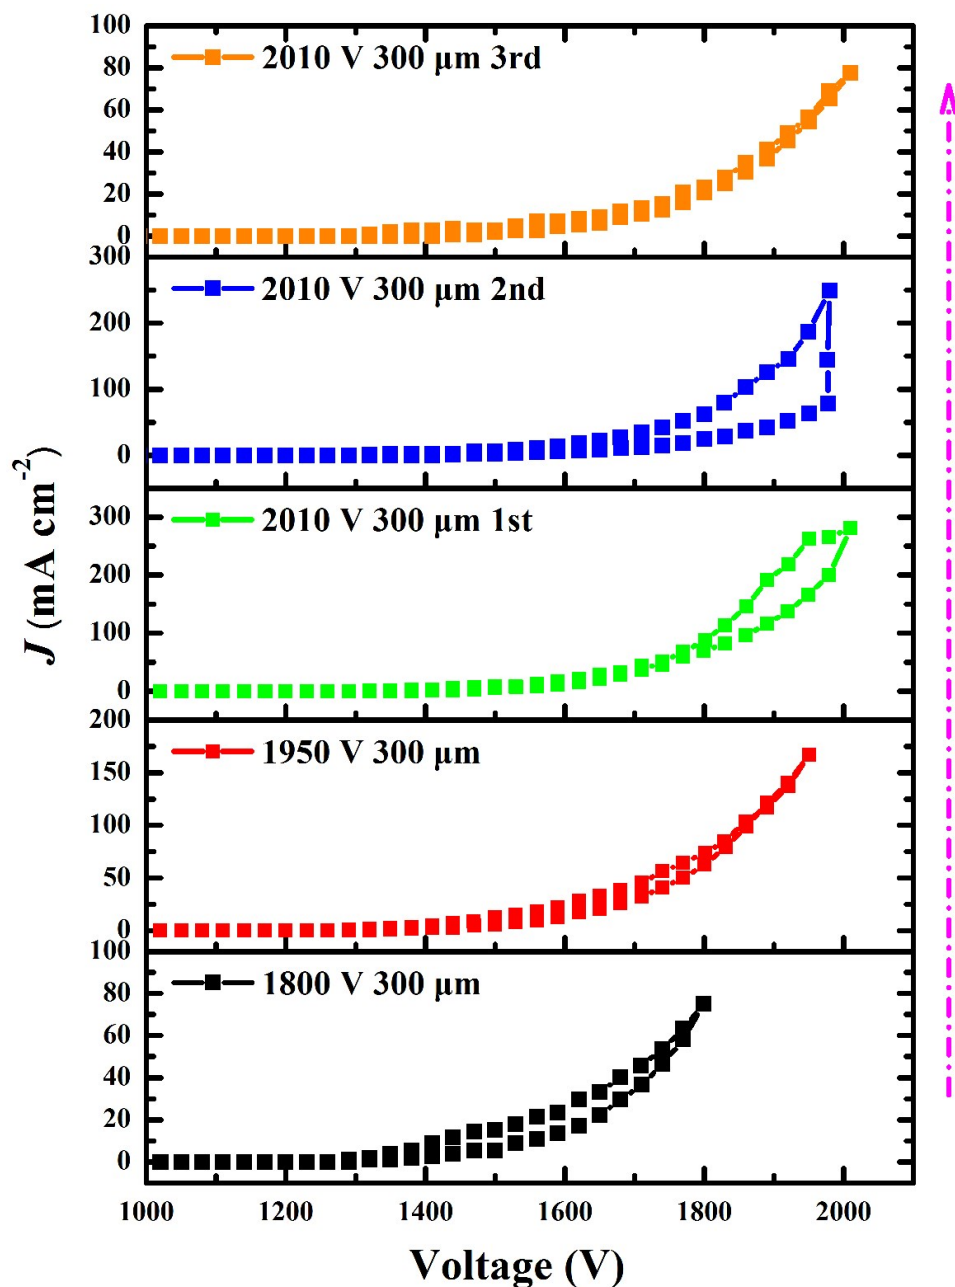

**Figure S8.** The curves of the current emission versus the applied voltages, the anode-cathode distance is 300  $\mu\text{m}$ . It is trying to getting the highest current density from the cross-section of the MXene- $\text{TiO}_2$  (1:1 mixed) composite. During the testing, we have increased the voltages gradually in order to avoid the destroy of the emission sites.

Table S1. The comparison of the field emission performance reported previously for



MXene and TiO<sub>2</sub> cathodes.

| Cathodes                                               | Turn-on fields                                                | Maximum current density                   | Refs.            |
|--------------------------------------------------------|---------------------------------------------------------------|-------------------------------------------|------------------|
| Ti <sub>3</sub> C <sub>2</sub> MXene                   | 7.6 V μm <sup>-1</sup> (0.1 mA cm <sup>-2</sup> )<br>(planar) | 0.37 mA cm <sup>-2</sup> (planar)         | 1                |
|                                                        | /                                                             | 59 mA cm <sup>-2</sup> (cross-sectional)  |                  |
| Ti <sub>3</sub> C <sub>2</sub> T <sub>x</sub><br>MXene | 3.4 V μm <sup>-1</sup> (0.1 mA cm <sup>-2</sup> )             | 0.20 mA cm <sup>-2</sup>                  | 2                |
| Pristine TiO <sub>2</sub>                              | 12.49 V μm <sup>-1</sup> (0.01 mA cm <sup>-2</sup> )          | 2 mA cm <sup>-2</sup>                     | 3                |
| TiO <sub>2</sub><br>nanotubes                          | 102.5 V μm <sup>-1</sup> (0.1 mA cm <sup>-2</sup> )           | 0.30 mA cm <sup>-2</sup>                  | 4                |
| TiO <sub>2</sub> nanotube                              | 2.44 V μm <sup>-1</sup> (0.01 mA cm <sup>-2</sup> )           | 3.3 mA cm <sup>-2</sup>                   | 5                |
| MXene-TiO <sub>2</sub><br>composites                   | 4.33 V μm <sup>-1</sup> (0.1 mA cm <sup>-2</sup> )            | 1.52 mA cm <sup>-2</sup> (planar)         | <b>This work</b> |
|                                                        | /                                                             | 289 mA cm <sup>-2</sup> (cross-sectional) |                  |

Notes and references

- 1 J. Chen, B. Yang, Y. D. Lim, W. Duan, Y. Zhao, B. K. Tay and X. Yan, *Nanotechnology*, 2020, **31**, 285701.
- 2 H. Wu, S. Shen, X. Xu, C. Qiao, X. Chen, J. Li, W. Li and W. Ou-Yang, *IEEE Trans Electron Devices*, 2020, **67**, 5138-5143.
- 3 W.-D. Zhu, C.-W. Wang, J.-B. Chen, Y. Li and J. Wang, *Appl. Surf. Sci.*, 2014, **301**, 525-529.
- 4 X. Xu, T. Zhai, M. Shao and J. Huang, *Phys. Chem. Chem. Phys.*, 2012, **14**, 16371-16376.
- 5 A.-Z. Liao, C.-W. Wang, J.-B. Chen, X.-Q. Zhang, Y. Li and J. Wang, *Mater. Res. Bull.*, 2015, **70**, 988-994.
